# Supplementary material
Source: ML conference proceedings conference paper supplement (https://openreview.net/forum?id=3apt5AJ5QN)

synthetic -  $N=10$ ,  $B=3$ , discount=0.9, 1 epochs

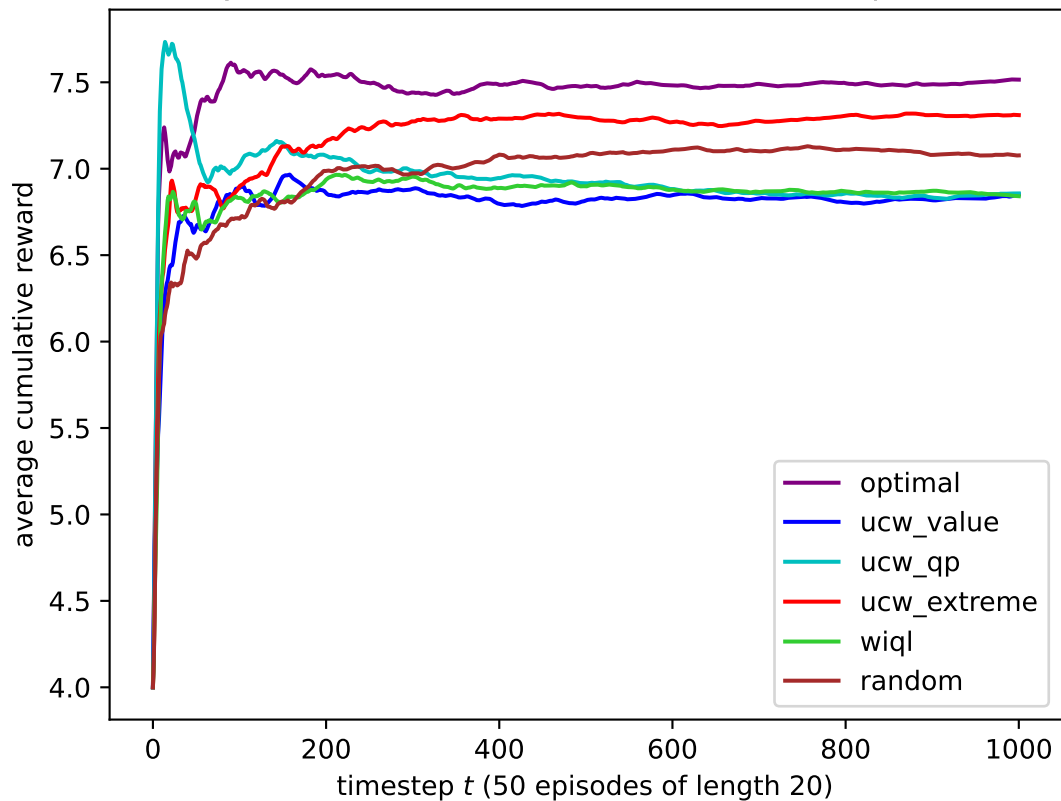

Supplement: supplementary_material [file attachment]

synthetic -  $N=10$ , budget=3, discount=0.9, 1 epochs

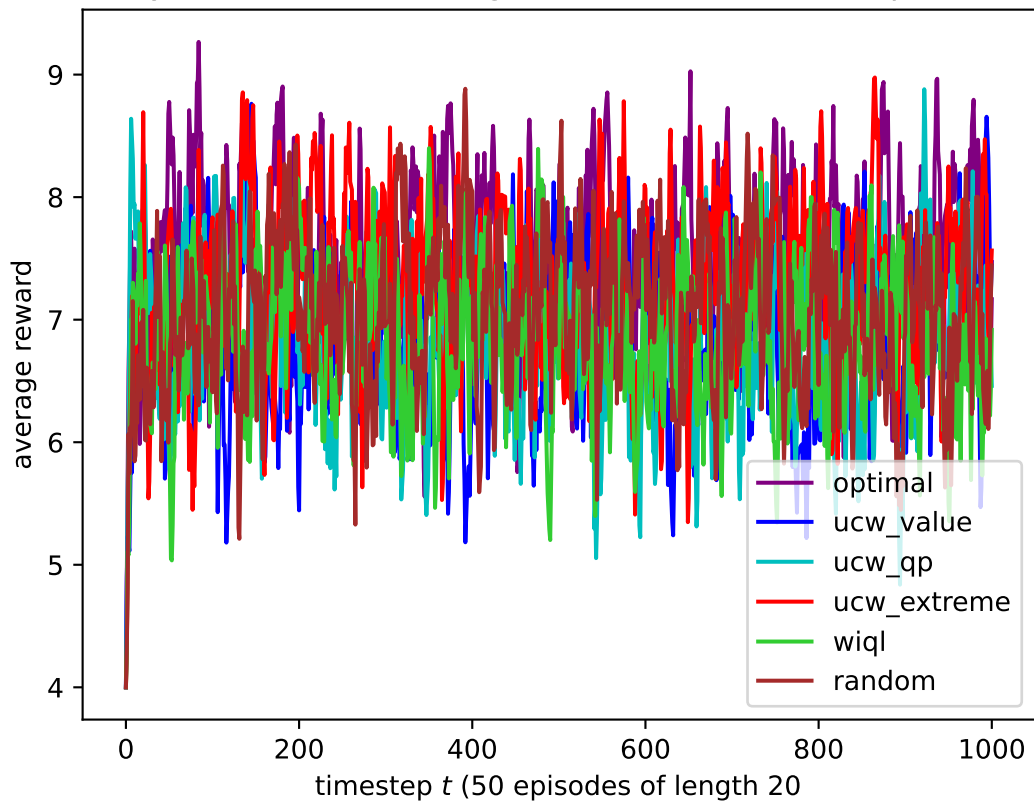

Supplement: supplementary_material [file attachment]
